# Supplementary material for: Do multiple experimenters improve the reproducibility of animal studies?
Source: PLoS Biol. 2022 May 5;20(5):e3001564. doi: 10.1371/journal.pbio.3001564 (PMC9070896; doi:10.1371/journal.pbio.3001564)
Supplement: S2 Table — (XLSX) [file pbio.3001564.s005.xlsx]

## Sheet: Tabelle2
Laboratory	Experimenter	Date of testing (start)	Arrival date of the animals	Sex	Age (years)	Experience in handling mice	Experience in test paradigms
Lab A	A	2019-01-29	2019-01-09	female	40	well-experienced	well-experienced
	B	2019-02-05	2019-01-16	female	35	well-experienced	well-experienced
	C	2019-03-19	2019-02-27	female	23	no prior experience	no prior experience
	D	2019-03-26	2019-03-06	female	25	no prior experience	no prior experience
Lab B	A	2018-11-20	2018-10-30	female	29	well-experienced	well-experienced
	B	2018-12-11	2018-11-20	female	28	moderately experienced	no prior experience
	C	2019-02-05	2019-01-15	male	27	moderately experienced	no prior experience
	D	2019-02-19	2019-01-29	male	37	moderately experienced	moderately experienced
Lab C	A	2020-02-04	2020-01-14	female	35	well-experienced	well-experienced
	B	2020-02-18	2020-01-28	male	42	well-experienced	well-experienced
	C	2020-03-03	2020-02-11	female	61	well-experienced	no prior experience
	D	2020-03-17	2020-02-25	female	26	well-experienced	no prior experience
